# Supplementary material for: Genome-Wide Analysis of the Expansin Gene Family in Populus and Characterization of Expression Changes in Response to Phytohormone (Abscisic Acid) and Abiotic (Low-Temperature) Stresses
Source: MDPI journal article supplement (doi:10.3390/ijms24097759), 2023-04-24
Supplement: s1 [file s1]

## Supplementary Material

**Supplemental Table S1.** Conserved motifs predicted by MEME program in PtEXs.

| motif | Width | E-value  | Motif sequence                                     |
|-------|-------|----------|----------------------------------------------------|
| 1     | 50    | 4.1e-781 | RTGWQPMSRNWQNWQSNLYLNGQSLSFKVTTS DGRTVVSYNVAPSSWSF |
| 2     | 41    | 1.8e-664 | HATFYGGGDASGTMGGACGYGNLYSQGYGTNTAALSTALFN          |
| 3     | 26    | 1.8e-438 | SDNGGWCNPPRPHFDLAMPFLKIAE                          |
| 4     | 50    | 7.5e-793 | GIVPVSYRRVPCRRRGGIRFTINGHSYFNLVLITNVGGAGDVHAVSVKGS |
| 5     | 15    | 1.5e-261 | NGLSCGACFEIRCVN                                    |
| 6     | 21    | 1.5e-210 | SGSPSILITATNFCPPNYALP                              |
| 7     | 32    | 5.60E-98 | ELFAYGVVDVEFRRIPCRFPGYNLMFKVHEHS                   |
| 8     | 28    | 9.70E-62 | DGKWIWARNVLPEDWKPGMTYDSGVQIT                       |
| 9     | 8     | 7.90E-57 | QTFEGKQF                                           |
| 10    | 29    | 1.60E-51 | DDGVNVVVTDYGEDNTDFILSTRAYARM                       |

**Supplementary Table S2.** TPM values of PtEXs genes in transcriptome sequencing of nine poplar tissues.

[illegible]

|                 |         |         |         |         |         |         |         |         |         |
|-----------------|---------|---------|---------|---------|---------|---------|---------|---------|---------|
| <i>PtEXPA20</i> | 5.6387  | 1.28375 | 3.6212  | 0.3856  | 0.07525 | 4.1132  | 0       | 5.7772  | 2.68995 |
| <i>PtEXPB3</i>  | 6.74765 | 6.9824  | 6.26605 | 1.9664  | 1.99285 | 5.44905 | 1.3299  | 8.34675 | 4.5688  |
| <i>PtEXPA17</i> | 5.6207  | 7.59005 | 6.1199  | 2.00295 | 0.78285 | 5.9735  | 5.79455 | 6.853   | 3.51815 |
| <i>PtEXPA24</i> | 0       | 0.61075 | 0.11505 | 0.05515 | 0       | 2.25425 | 0.3636  | 1.2403  | 0.499   |
| <i>PtEXLB2</i>  | 3.37085 | 3.848   | 3.02845 | 4.6962  | 4.05775 | 4.19255 | 3.86825 | 4.03695 | 5.6417  |
| <i>PtEXLB3</i>  | 0.1837  | 7.9846  | 0       | 0.3054  | 0       | 0.0831  | 4.1475  | 2.27375 | 4.7496  |
| <i>PtEXPA32</i> | 7.0776  | 4.63425 | 5.56275 | 4.8263  | 7.69545 | 8.35875 | 4.6268  | 7.7714  | 5.3472  |
| <i>PtEXPA4</i>  | 0.93515 | 0.23025 | 0       | 0.08745 | 0       | 0       | 0.75065 | 0.08535 | 0       |
| <i>PtEXPA1</i>  | 0.4998  | 0       | 0.17095 | 0       | 0       | 0       | 0.2852  | 0.05415 | 0       |
| <i>PtEXPA13</i> | 0       | 0       | 0       | 0       | 0       | 0       | 0       | 0       | 0       |
| <i>PtEXPA12</i> | 0       | 0       | 0       | 0       | 0       | 1.0142  | 1.06055 | 0.0695  | 0       |
| <i>PtEXPA14</i> | 2.7896  | 0.0787  | 0.13175 | 0       | 0       | 0.09165 | 1.0624  | 0.03945 | 0       |
| <i>PtEXLB1</i>  | 0.27865 | 0.20205 | 3.1513  | 0.20785 | 0       | 0.2921  | 5.85225 | 2.0942  | 0.5947  |
| <i>PtEXLB5</i>  | 0       | 4.9367  | 2.613   | 3.2479  | 0       | 3.3525  | 6.30125 | 3.83125 | 1.27005 |
| <i>PtEXLA2</i>  | 4.04755 | 4.84995 | 1.5976  | 6.84115 | 3.61765 | 4.6709  | 3.3189  | 3.90135 | 6.91395 |
| <i>PtEXPA6</i>  | 4.8876  | 0.603   | 0.3407  | 0.91245 | 4.21285 | 2.50185 | 0.1104  | 1.4972  | 0.63915 |
| <i>PtEXPA8</i>  | 6.9987  | 5.39455 | 3.74755 | 5.33815 | 7.95215 | 7.2564  | 2.92095 | 5.0085  | 6.2822  |
| <i>PtEXPA22</i> | 4.1977  | 6.19065 | 5.7976  | 1.06965 | 0.0631  | 0.0807  | 0.0757  | 6.7203  | 0.76295 |
| <i>PtEXPA15</i> | 5.166   | 0.7039  | 0       | 0       | 0       | 0.0642  | 0.70135 | 0.5274  | 0.1555  |
| <i>PtEXPA18</i> | 0       | 0.9607  | 2.62255 | 0.05925 | 0       | 0       | 1.18215 | 2.5502  | 0.05715 |
| <i>PtEXPA27</i> | 7.3889  | 6.40155 | 4.2291  | 3.08545 | 6.3123  | 5.29515 | 2.143   | 7.0422  | 4.17595 |
| <i>PtEXPA30</i> | 5.52195 | 8.7086  | 3.3992  | 3.8161  | 3.9579  | 4.10925 | 3.30105 | 4.8975  | 3.8507  |
| <i>PtEXPA26</i> | 9.83135 | 8.6641  | 5.694   | 3.2896  | 5.21195 | 7.07055 | 6.4496  | 7.86615 | 4.5251  |
| <i>PtEXPA5</i>  | 2.8184  | 2.43445 | 1.9271  | 2.1785  | 3.41605 | 3.45915 | 1.3122  | 2.77135 | 2.53985 |
| <i>PtEXLA1</i>  | 3.18435 | 5.59525 | 1.50705 | 7.33715 | 4.99605 | 0.5511  | 7.30765 | 2.95895 | 3.03725 |
| <i>PtEXPA31</i> | 3.8848  | 4.98595 | 3.6256  | 2.38045 | 4.94465 | 7.3377  | 1.76715 | 6.3342  | 2.4432  |

**Supplemental Table S3.** List of primer sequences used in qRT-PCR reactions

| Gene name       | Forward Primer        | Reverse Primer         | Primer amplification efficiency |
|-----------------|-----------------------|------------------------|---------------------------------|
| UBQ             | GTTGATTTTGTCTGGGAAGC  | GATCTTGCCCTTCACGTTGT   | 101%                            |
| <i>PtEXLA2</i>  | GCTGGATGTGGTGCTTGTTT  | TGTCTTGACCCATGCCCTTG   | 101.9%                          |
| <i>PtEXPB3</i>  | TGAACTCCCAGTCATTTATCG | TCTAGCCACTCAGTGCCTCC   | 103.3%                          |
| <i>PtEXPA3</i>  | ACTCAGGCAGCCCGTCTATT  | GGAATCCGTTTATTGTGAACCT | 102.5%                          |
| <i>PtEXPA12</i> | GCCATTCCAGTACCATCACC  | ACAGACACCGCACGAACATC   | 102.7%                          |
| <i>PtEXPA13</i> | TGTAACCCACCTCGTCCTCA  | CGGAAACCGTTGATAGTGAA   | 104.3%                          |
| <i>PtEXPA17</i> | TTGATGTGGAAGGGTGAAGG  | GTCAGCACCACCGTAGAAGG   | 105%                            |
| <i>PtEXPA18</i> | ATCCTCCTCGTCCTCACTTC  | TTCACGCTCACTTTCACAATA  | 105.6%                          |
| <i>PtEXPA19</i> | GGGTCTTGCTACGAGATTAGG | AAAGTGTTGTTGAGGAGGGTT  | 101.5%                          |
| <i>PtEXPA27</i> | AGGGAGGGATTAGATTACCA  | GATAGGCTTTGACCGTTGAG   | 105.3%                          |



amplification efficiency of each primer pair was obtained by combining the dominant equation of the regression between the CT value of amplification and the dilution gradient ( $E = (10^{(-1/\text{Slope})} - 1)\%$ ). As PtEXLA2 and PtEXPA12 were not expressed in 1000×, the amplification efficiencies for these two genes were calculated based on three concentration gradients.
